# Supplementary material for: Holstein–Peirls–Hubbard trimer as a model for quadrupolar two-photon absorbing dyes
Source: Royal Society of Chemistry journal article supplement (doi:10.1039/c0cp00998a), 2010-11-17
Supplement: c0cp00998a.pdf [file c0cp00998a.pdf]

## Supplementary Information

### **Holstein-Peirls-Hubbard Trimer as a model for quadrupolar two-photon absorbing dyes**

Robertino Pilot<sup>[a]</sup> and Renato Bozio<sup>\*[a]</sup>

[a] Dr. Robertino Pilot

Consorzio INSTM, UdR Padova  
Department of Chemical Sciences  
Via Marzolo 1, 35131 Padova (Italy)  
Fax: +39 049 827 5135  
E-Mail: roberto.pilot@unipd.it

Prof. Renato Bozio  
Consorzio INSTM, UdR Padova  
Department of Chemical Sciences  
Via Marzolo 1, 35131 Padova (Italy)  
Fax: +39 049 827 5135  
E-Mail: renato.bozio@unipd.it

## TABLES

**Table S-1.** Expressions and energies of the complete (6 state) basis set. Symmetry of the eigenstates: ‘g’ stands for gerade and ‘u’ stands for ungerade.

| Basis State                                                                                                                                  | Energy               | Eigenstate  | Symmetry |
|----------------------------------------------------------------------------------------------------------------------------------------------|----------------------|-------------|----------|
| $ S_1\rangle = \hat{a}_{2\uparrow}^+ \hat{a}_{2\downarrow}^+  0\rangle$                                                                      | $U_d$                | $ 1\rangle$ | g        |
| $ S_2\rangle = \frac{1}{\sqrt{2}} [\hat{a}_{1\uparrow}^+ \hat{a}_{2\downarrow}^+ + \hat{a}_{2\uparrow}^+ \hat{a}_{1\downarrow}^+]  0\rangle$ | $\varepsilon$        | $ 2\rangle$ | u        |
| $ S_3\rangle = \frac{1}{\sqrt{2}} [\hat{a}_{3\uparrow}^+ \hat{a}_{2\downarrow}^+ + \hat{a}_{2\uparrow}^+ \hat{a}_{3\downarrow}^+]  0\rangle$ | $\varepsilon$        | $ 3\rangle$ | g        |
| $ S_4\rangle = \frac{1}{\sqrt{2}} [\hat{a}_{1\uparrow}^+ \hat{a}_{3\downarrow}^+ + \hat{a}_{3\uparrow}^+ \hat{a}_{1\downarrow}^+]  0\rangle$ | $2\varepsilon$       | $ 4\rangle$ | g        |
| $ S_5\rangle = \hat{a}_{3\uparrow}^+ \hat{a}_{3\downarrow}^+  0\rangle$                                                                      | $2\varepsilon + U_a$ | $ 5\rangle$ | u        |
| $ S_6\rangle = \hat{a}_{1\uparrow}^+ \hat{a}_{1\downarrow}^+  0\rangle$                                                                      | $2\varepsilon + U_a$ | $ 6\rangle$ | g        |

**Table S-2.** Exact eigenvalues and eigenvectors of the reduced Hamiltonian Eq. (5).

| Eigenvector <sup>a</sup>             | Eigenvalue <sup>b</sup>                                         | Transition Energy <sup>b</sup>                         |
|--------------------------------------|-----------------------------------------------------------------|--------------------------------------------------------|
| $ 1\rangle = \sum_i a_i  S_i\rangle$ | $E_1 = \frac{(U_d + \varepsilon) - \sqrt{\Delta^2 + 16t^2}}{2}$ | $E_{21} = \frac{\Delta + \sqrt{\Delta^2 + 16t^2}}{2}$  |
| $ 2\rangle = \sum_i b_i  S_i\rangle$ | $E_2 = \varepsilon$                                             | $E_{32} = \frac{-\Delta + \sqrt{\Delta^2 + 16t^2}}{2}$ |
| $ 3\rangle = \sum_i c_i  S_i\rangle$ | $E_3 = \frac{(U_d + \varepsilon) + \sqrt{\Delta^2 + 16t^2}}{2}$ | $E_{31} = \sqrt{\Delta^2 + 16t^2}$                     |

<sup>a</sup>Eigenvectors coefficients:

$$\begin{aligned}
 a_1 &= \frac{E_{21}}{\sqrt{E_{21}^2 + 4t^2}} & b_1 &= 0 & c_1 &= \frac{-E_{32}}{\sqrt{E_{32}^2 + 4t^2}} \\
 a_2 &= a_3 = \frac{\sqrt{2}t}{\sqrt{E_{21}^2 + 4t^2}} & b_2 &= -b_3 = \frac{1}{\sqrt{2}} & c_2 &= c_3 = \frac{\sqrt{2}t}{\sqrt{E_{32}^2 + 4t^2}}
 \end{aligned}$$

<sup>b</sup> $\Delta = \varepsilon - U_d$

**Table S-3.** Analytical expression of  $\alpha(-\omega_1; +\omega_1)$  for the dimer and the trimer without electron-phonon coupling. Data concerning the dimer are from Ref. 32.

|                         | DIMER                                                                                                                  | TRIMER                                                                                                       |
|-------------------------|------------------------------------------------------------------------------------------------------------------------|--------------------------------------------------------------------------------------------------------------|
| Level Diagram           | 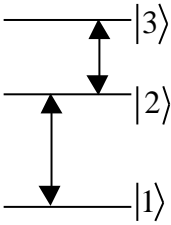                                      |                                                                                                              |
| Expression for $\alpha$ | $\alpha(-\omega_1; \omega_1) = \frac{-2}{\epsilon_0} \frac{R_{12}^2 E_{21}^2}{(\hbar\omega_1 + i\Gamma)^2 - E_{21}^2}$ |                                                                                                              |
| Transition Dipoles      | $R_{12}^2 = (edc_1)^2$                                                                                                 | $R_{12}^2 = (eda_2 b_2)^2$                                                                                   |
| Transition energies     | $E_{21} = \frac{U + \sqrt{U^2 + 16t^2}}{2}$ $E_{32} = \frac{-U + \sqrt{U^2 + 16t^2}}{2}$                               | $E_{21} = \frac{\Delta + \sqrt{\Delta^2 + 16t^2}}{2}$ $E_{32} = \frac{-\Delta + \sqrt{\Delta^2 + 16t^2}}{2}$ |
| Coefficient Expressions | $c_1 = \frac{E_{32}}{\sqrt{E_{32}^2 + 4t^2}}$                                                                          | $a_2 b_2 = \frac{t}{\sqrt{E_{21}^2 + 4t^2}}$                                                                 |

# FIGURES

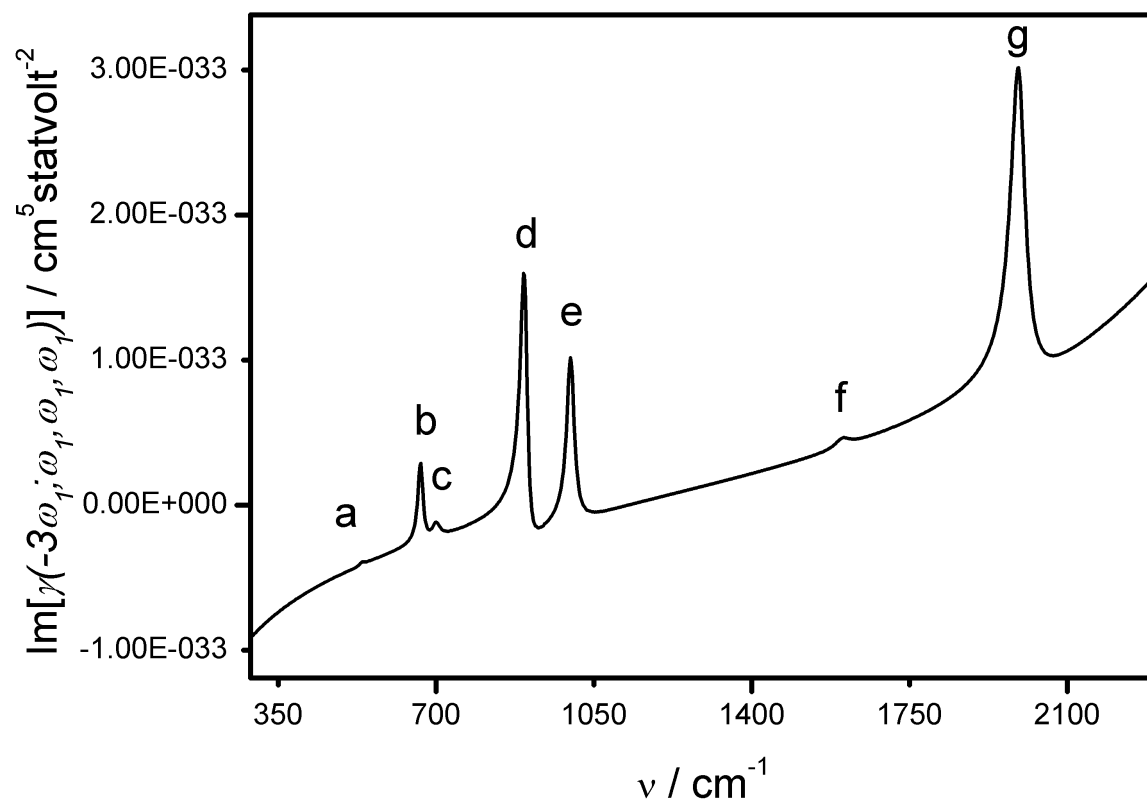

**Fig. S-1.** Enlargement of  $\text{Im}[\chi(-3\omega_1; \omega_1, \omega_1, \omega_1)]$  in the vibrational region.

## APPENDIXES

### APPENDIX 1

#### Definition of the BOV modes

We recognise four BOV modes in the system under investigation (3N-5, N=3), but we are only interested in the symmetric and antisymmetric stretching modes which modulate the distance between A and D. The modes are respectively written as follows:

$$Q_S^{\text{BOV}} = \frac{1}{\sqrt{2}}(q_3 - q_1) \quad Q_{AS}^{\text{BOV}} = \frac{1}{\sqrt{2m}}(\sqrt{m_1}q_3 - 2\sqrt{m_2}q_2 + \sqrt{m_1}q_1) \quad (\text{A1-1})$$

where  $m_i$  is the mass of the  $i$ -site,  $m = 2m_1 + m_2$  and  $q_i$  are the spectroscopic mass-weighted coordinates. The subscripts “S” and “AS” to  $Q^e$  specify if the coordinate is symmetric or antisymmetric with respect to the exchange of the sites 1 and 3. The BOV modes can also be treated as in-phase and out-of-phase combinations of a “left” and a “right” coordinate:

$$Q_S^{\text{BOV}} = \frac{1}{\sqrt{2}}(Q_L^{\text{BOV}} + Q_R^{\text{BOV}}) \quad Q_{AS}^{\text{BOV}} = \frac{1}{\sqrt{2}}\sqrt{\frac{m_1}{m}}(Q_L^{\text{BOV}} - Q_R^{\text{BOV}}) \quad (\text{A1-2})$$

where  $Q_L^{\text{BOV}} = \sqrt{\frac{m_2}{m_1}}q_2 - q_1$  and  $Q_R^{\text{BOV}} = q_3 - \sqrt{\frac{m_2}{m_1}}q_2$ : the former affects only the distance between the sites 1 and 2 and the latter between the sites 2 and 3. In terms of dimensionless modes we finally have

$$u_+ \equiv u_S = \frac{1}{\sqrt{2}}(u_L + u_R) \quad u_- \equiv u_{AS} = \frac{1}{\sqrt{2}}R_m(u_L - u_R) \quad (\text{A1-3})$$

$$u_{L,R} = \sqrt{\frac{2\omega_+}{\hbar}}Q_{L,R}^{\text{BOV}} \quad R_m = \sqrt{\frac{\omega_-}{\omega_+}}\sqrt{\frac{m_1}{m}} \quad (\text{A1-4})$$

### Derivation of the vibronic coupling Hamiltonian $\hat{H}_{\text{EMV}}$

The vibronic coupling Hamiltonian can be derived by considering the site-energies as linearly dependent on the SEV modes: to perform this expansion, Eq. (5) needs recasting in a more useful way, so that all site-energies are shown explicitly:

$$\begin{aligned}\hat{H}_{\text{H}} = & \varepsilon_{\text{LUMO}}^{\text{Acceptor 1}} \hat{n}_1 + \varepsilon_{\text{LUMO}}^{\text{Acceptor 3}} \hat{n}_3 + \varepsilon_{\text{HOMO}}^{\text{Donor}} \hat{n}_2 \\ & + U_{\text{d}} \hat{n}_{2\uparrow} \hat{n}_{2\downarrow} + U_{\text{a}} (\hat{n}_{1\uparrow} \hat{n}_{1\downarrow} + \hat{n}_{3\uparrow} \hat{n}_{3\downarrow}) \\ & - t_{\text{AD}} \hat{T}_{\text{AD}} - t_{\text{DA}} \hat{T}_{\text{DA}}\end{aligned}\quad (\text{A1-5})$$

The first row is equivalent to the term  $\varepsilon(\hat{n}_1 + \hat{n}_3)$  since  $\varepsilon_{\text{LUMO}}^{\text{Acceptor 1}} = \varepsilon_{\text{LUMO}}^{\text{Acceptor 3}}$  and  $\varepsilon_{\text{HOMO}}^{\text{Donor}}$  can be set to zero (as considered in the main text) without loss of generality. All site-energies are therefore developed in power series as a function of the corresponding SEV modes up to the first order:

$$\varepsilon_{\text{LUMO}}^{\text{Acceptor 1}} = (\varepsilon_{\text{LUMO}}^{\text{Acceptor 1}})^0 + \sum_i \left( \frac{\partial \varepsilon_{\text{LUMO}}^{\text{Acceptor 1}}}{\partial Q_{i1}} \right)_0 Q_{i1} \quad (\text{A1-6})$$

$$\varepsilon_{\text{LUMO}}^{\text{Acceptor 3}} = (\varepsilon_{\text{LUMO}}^{\text{Acceptor 3}})^0 + \sum_i \left( \frac{\partial \varepsilon_{\text{LUMO}}^{\text{Acceptor 3}}}{\partial Q_{i3}} \right)_0 Q_{i3} \quad (\text{A1-7})$$

$$\varepsilon_{\text{HOMO}}^{\text{Donor}} = (\varepsilon_{\text{HOMO}}^{\text{Donor}})^0 + \sum_i \left( \frac{\partial \varepsilon_{\text{D}}}{\partial Q_{i2}} \right)_0 Q_{i2} \quad (\text{A1-8})$$

Considering only the first row in (A1-5) and inserting the previous expressions, the following equation is obtained:

$$\begin{aligned}\varepsilon_{\text{LUMO}}^{\text{Acceptor 1}} \hat{n}_1 + \varepsilon_{\text{LUMO}}^{\text{Acceptor 3}} \hat{n}_3 + \varepsilon_{\text{HOMO}}^{\text{Donor}} \hat{n}_2 = \\ \left( (\varepsilon_{\text{LUMO}}^{\text{Acceptor 1}})^0 + \sum_i \left( \frac{\partial \varepsilon_{\text{LUMO}}^{\text{Acceptor 1}}}{\partial Q_{i1}} \right)_0 Q_{i1} \right) \hat{n}_1 + \left( (\varepsilon_{\text{LUMO}}^{\text{Acceptor 3}})^0 + \sum_i \left( \frac{\partial \varepsilon_{\text{LUMO}}^{\text{Acceptor 3}}}{\partial Q_{i3}} \right)_0 Q_{i3} \right) \hat{n}_3 + \left( (\varepsilon_{\text{HOMO}}^{\text{Donor}})^0 + \sum_i \left( \frac{\partial \varepsilon_{\text{D}}}{\partial Q_{i2}} \right)_0 Q_{i2} \right) \hat{n}_2\end{aligned}\quad (\text{A1-9})$$

On the right hand side we then set  $(\varepsilon_{\text{HOMO}}^{\text{Donor}})^0 = 0$  and define  $(\varepsilon_{\text{LUMO}}^{\text{Acceptor 1}})^0 - (\varepsilon_{\text{HOMO}}^{\text{Donor}})^0 = \varepsilon$ , so that we obtain:

$$\begin{aligned}\varepsilon_{\text{LUMO}}^{\text{Acceptor 1}} \hat{n}_1 + \varepsilon_{\text{LUMO}}^{\text{Acceptor 3}} \hat{n}_3 + \varepsilon_{\text{HOMO}}^{\text{Donor}} \hat{n}_2 = \\ \varepsilon(\hat{n}_1 + \hat{n}_3) + \hat{n}_1 \sum_i \left( \frac{\partial \varepsilon_{\text{LUMO}}^{\text{Acceptor 1}}}{\partial Q_{i1}} \right)_0 Q_{i1} + \hat{n}_3 \sum_i \left( \frac{\partial \varepsilon_{\text{LUMO}}^{\text{Acceptor 3}}}{\partial Q_{i3}} \right)_0 Q_{i3} + \hat{n}_2 \sum_i \left( \frac{\partial \varepsilon_{\text{HOMO}}^{\text{Donor}}}{\partial Q_{i2}} \right)_0 Q_{i2}\end{aligned}\quad (\text{A1-10})$$

Making use of the definitions in Eq. (10) and (13), the following equation can be written down:

$$\varepsilon_{\text{LUMO}}^{\text{Acceptor 1}} \hat{n}_1 + \varepsilon_{\text{LUMO}}^{\text{Acceptor 3}} \hat{n}_3 + \varepsilon_{\text{HOMO}}^{\text{Donor}} \hat{n}_2 = \varepsilon(\hat{n}_1 + \hat{n}_3) + \sum_i \left\{ \frac{g_{iA}}{\sqrt{2}} [\mathbf{R}_{i+} \hat{N}^+ + \mathbf{R}_{i-} \hat{N}^-] + g_{iD} Q_{i2} \hat{n}_2 \right\} \quad (\text{A1-11})$$

where  $\sum_i \left\{ \frac{g_{iA}}{\sqrt{2}} [R_{i+} \hat{N}^+ + R_{i-} \hat{N}^-] + g_{iD} Q_{i2} \hat{n}_2 \right\}$  is the definition of  $\hat{H}_{EMV}$  in Eq. (6).

### Derivation of the vibrational coupling Hamiltonian $H_{EIP}$

In this case we develop the charge transfer integrals (in the last two terms in Eq. (5) or in the last row in Eq. (A1-5)) in power series as a function of the BOV modes:

$$t'_{AD} = t_{AD} + \left( \frac{\partial t_{AD}}{\partial u_L} \right)_0 u_L \quad \text{and} \quad t'_{DA} = t_{DA} + \left( \frac{\partial t_{DA}}{\partial u_R} \right)_0 u_R \quad (\text{A1-12})$$

Notice that in the electronic Hamiltonian  $\hat{H}_H$  the charge transfer integrals indicated with  $t$  are considered to be “unperturbed”: once the vibronic coupling is introduced, the unperturbed ones are still named  $t$  and the coupled ones are named  $t'$ .

The term  $t_{AD} \hat{T}_{AD} + t_{DA} \hat{T}_{DA}$  in Eq. (5) can be rewritten including the expansion (A1-12) and making use of the definitions (A1-3), (11) and (13):

$$t'_{AD} \hat{T}_{AD} + t'_{DA} \hat{T}_{DA} = t_{AD} \hat{T}_{AD} + t_{DA} \hat{T}_{DA} - \frac{g}{\sqrt{2}} [u_+ \hat{T}^+ + R_m u_- \hat{T}^-] \quad (\text{A1-13})$$

where  $\frac{g}{\sqrt{2}} [u_+ \hat{T}^+ + R_m u_- \hat{T}^-]$  is the definition of  $\hat{H}_{EIP}$  in Eq. (7).

### Derivation of the vibronic Hamiltonian $H_V$

Starting from the vibrational Hamiltonian:

$$\hat{H}_V = \sum_i \left\{ \frac{\hbar \omega_{iA}}{4} [(Q_{i1}^2 + P_{i1}^2) + (Q_{i3}^2 + P_{i3}^2)] + \frac{\hbar \omega_{iD}}{4} [P_{i2}^2 + Q_{i2}^2] \right\} \quad (\text{A1-14})$$

It can be easily rewritten in the form of Eq. (8), by using the Eq. (10)-(12).

## APPENDIX 2

The expressions for the vibrational operators can be worked out by solving the Heisenberg equation of the motion:

$$i\hbar \frac{d\hat{A}^H(t)}{dt} = [\hat{A}^H(t), \hat{H}^H(t)] \quad (A2-1)$$

The superscript H specifies that the operator is in the Heisenberg picture;  $\hat{A}^H(t)$  represents any of the vibrational operators or the corresponding momenta.  $\hat{H}^H(t)$  is the Heisenberg representation of the total Hamiltonian defined in Eq. (1). As an example, the equation of motion for  $\hat{R}_{i+}^H(t)$  is worked out in the following: Eq. (A2-1) is solved for  $\hat{A}_{i+}^H(t) = \hat{S}_{i+}^H(t)$  providing:

$$i\hbar \frac{d\hat{S}_{i+}^H(t)}{dt} = [\hat{S}_{i+}^H(t), \hat{H}^H(t)] = [\hat{S}_{i+}^H(t), \hat{H}_{EMV}^H(t)] + [\hat{S}_{i+}^H(t), \hat{H}_V^H(t)] \quad (A2-2)$$

By substituting the expressions for  $\hat{H}_{EMV}^H(t)$  and  $\hat{H}_V^H(t)$  we have:

$$\hbar \frac{d\hat{S}_{i+}^H(t)}{dt} = -\sqrt{2}g_{iA} [\hat{N}^{+H}(t)] - \hbar\omega_{iA} \hat{R}_{i+}^H(t) \quad (A2-3)$$

The relation  $[\hat{R}_{i+}^H(t)^2, \hat{S}_{i+}^H(t)] = 4i\hat{R}_{i+}^H(t)$  has been used. Finally, considering the expression

$\frac{1}{\omega_{iA}} \frac{d\hat{R}_{i+}^H(t)}{dt} = \hat{R}_{i+}^H(t)$ , we achieve in the time domain:

$$\hat{R}_{i+}^H(t) + \omega_{iA}^2 \hat{R}_{i+}^H(t) = \frac{-\sqrt{2}g_{iA}\omega_{iA}}{\hbar} \hat{N}^{+H}(t) \quad (A2-4)$$

In the frequency domain (i.e. performing a Fourier transform on the previous equation) we have:

$$\hat{R}_{i+}^H(\omega) = D_A^i(\omega) \hat{N}^{+H}(\omega) \quad (A2-5)$$

Where  $D_A^i(\omega) = \frac{-\sqrt{2}g_{iA}\omega_{iA}}{\hbar[\omega_{iA}^2 - (\omega + i\gamma_A)^2]}$ .

The calculation outlined above, can be repeated for all vibrational operators: in the following the expressions for all of them are summarized:

$$\hat{R}_{i+}^H(\omega) = D_A^i(\omega) \hat{N}^{+H}(\omega) \quad \hat{Q}_{i2}^H(\omega) = D_D^i(\omega) \hat{n}_2^H(\omega) \quad (A2-6)$$

$$\hat{R}_{i+}^H(\omega) = D_A^i(\omega) \hat{N}^{+H}(\omega) \quad \hat{R}_{i-}^H(\omega) = D_A^i(\omega) \hat{N}^{-H}(\omega) \quad (A2-7)$$

$$\hat{u}_-^H(\omega) = F_-(\omega) \hat{\Gamma}^{-H}(\omega) + G_-(\omega) \Im\{E(t) \hat{N}^{+H}(t)\} \quad (A2-8)$$

$$\hat{u}_+^H(\omega) = F_+(\omega) \hat{\Gamma}^{+H}(\omega) + G_+(\omega) \Im\{E(t) \hat{N}^{-H}(t)\} \quad (A2-9)$$

where

$$D_D^i(\omega) = \frac{-2g_{iD}\omega_{iD}}{\hbar[\omega_{iD}^2 - (\omega + i\gamma_D)^2]} \quad D_A^i(\omega) = \frac{-\sqrt{2}g_{iA}\omega_{iA}}{\hbar[\omega_{iA}^2 - (\omega + i\gamma_A)^2]} \quad (A2-10)$$

$$F_-(\omega) = \frac{R_m \sqrt{2}g\omega_-}{\hbar[\omega_-^2 - (\omega + i\gamma)^2]} \quad F_+(\omega) = \frac{\sqrt{2}g\omega_+}{\hbar[\omega_+^2 - (\omega + i\gamma)^2]} \quad (A2-11)$$

$$G_-(\omega) = \frac{-e\sqrt{2}h_z\omega_-R_m}{\hbar[\omega_-^2 - (\omega + i\gamma)^2]} \quad G_+(\omega) = \frac{e\sqrt{2}h_z\omega_+}{\hbar[\omega_+^2 - (\omega + i\gamma)^2]} \quad (A2-12)$$

$$D_D(\omega) = \sum_i g_{iD} D_D^i(\omega) \quad D_A(\omega) = \sum_i \frac{g_{iA}}{\sqrt{2}} D_A^i(\omega) \quad (A2-13)$$

$\Im\{f(t)\}$  is the Fourier transform of  $f(t)$ ;  $\gamma$  are the damping parameters for the vibrational transitions.

The Fourier transform and its inverse have been respectively performed with the relations

$$z(\omega) = \Im\{z(t)\} = \frac{1}{\sqrt{2\pi}} \int_{-\infty}^{+\infty} z(t) e^{i\omega t} dt \quad (A2-14a)$$

and

$$z(t) = \mathfrak{F}^{-1} \{z(\omega)\} = \frac{1}{\sqrt{2\pi}} \int_{-\infty}^{+\infty} z(\omega) e^{-i\omega t} d\omega \quad (\text{A2-14b})$$

The quantities  $F(\omega)$ ,  $G(\omega)$  and  $D(\omega)$  are usually called propagators: the first and the second are respectively originated by the dependence of  $t$  and  $d$  on the BOV coordinates, whereas  $D(\omega)$  derives from the dependence of the site energies on the SEV modes. The subscripts of  $D(\omega)$ , A and D, specify if it has been expanded the Donor or the Acceptor site energy; the subscripts of  $F(\omega)$  and  $G(\omega)$ , + and –, indicate that we are dealing with the coupling with  $u_+$  and  $u_-$ .

### Random phase approximation

The RPA requires that vibrational operators are replaced by their expectation values. The expression for the expectation values in the time and in the frequency domain are:

$$\langle \hat{Q}_{i2}(\omega) \rangle = D_D^i(\omega) \langle \hat{n}_2(\omega) \rangle \quad (\text{A2-15})$$

$$\langle \hat{R}_{i+}(\omega) \rangle = D_A^i(\omega) \langle \hat{N}^+(\omega) \rangle \quad \langle \hat{R}_{i-}(\omega) \rangle = D_A^i(\omega) \langle \hat{N}^-(\omega) \rangle \quad (\text{A2-16})$$

$$\langle \hat{u}_-(\omega) \rangle = F_-(\omega) \langle \hat{T}^-(\omega) \rangle + G_-(\omega) \mathfrak{F} \{ E(t) \langle \hat{N}^+(t) \rangle \} \quad (\text{A2-17})$$

$$\langle \hat{u}_+(\omega) \rangle = F_+(\omega) \langle \hat{T}^+(\omega) \rangle + G_+(\omega) \mathfrak{F} \{ E(t) \langle \hat{N}^-(t) \rangle \} \quad (\text{A2-18})$$

$$\langle \hat{Q}_{i2}(t) \rangle = \mathfrak{F}^{-1} \{ D_D^i(\omega) \langle \hat{n}_2(\omega) \rangle \} \quad (\text{A2-19})$$

$$\langle \hat{R}_{i+}(t) \rangle = \mathfrak{F}^{-1} \{ D_A^i(\omega) \langle \hat{N}^+(\omega) \rangle \} \quad \langle \hat{R}_{i-}(t) \rangle = \mathfrak{F}^{-1} \{ D_A^i(\omega) \langle \hat{N}^-(\omega) \rangle \} \quad (\text{A2-20})$$

$$\langle \hat{u}_-(t) \rangle = \mathfrak{F}^{-1} \{ F_-(\omega) \langle \hat{T}^+(\omega) \rangle \} + \mathfrak{F}^{-1} \{ G_-(\omega) \mathfrak{F} \{ E(t) \langle \hat{N}^-(t) \rangle \} \} \quad (\text{A2-21})$$

$$\langle \hat{u}_+(t) \rangle = \mathfrak{F}^{-1} \{ F_+(\omega) \langle \hat{T}^+(\omega) \rangle \} + \mathfrak{F}^{-1} \{ G_+(\omega) \mathfrak{F} \{ E(t) \langle \hat{N}^-(t) \rangle \} \} \quad (\text{A2-22})$$

### APPENDIX 3

We are interested in comparing  $\hat{h}_T^{(0)}$  and  $\hat{h}_H$ ; considering the six level system the expressions are the following

$$\hat{h}_H = \varepsilon(\hat{n}_1 + \hat{n}_3) + U_d \hat{n}_{2\uparrow} \hat{n}_{2\downarrow} + U_a (\hat{n}_{1\uparrow} \hat{n}_{1\downarrow} + \hat{n}_{3\uparrow} \hat{n}_{3\downarrow}) - t \hat{T}^+ \quad (A3-1)$$

$$\begin{aligned} \hat{h}_T^{(0)} = \hat{h}_H + \hat{h}_{EMV}^{(0)} + \hat{h}_{EIP}^{(0)} = \\ \left[ \varepsilon + \sum_i \frac{g_{iA}}{\sqrt{2}} \langle \hat{R}_{i+} \rangle^{(0)} \right] \hat{N}^+ + \sum_i g_{iD} \langle \hat{Q}_{i2} \rangle^{(0)} \hat{n}_2 + \left[ -t - \frac{g}{\sqrt{2}} \langle \hat{u}_+ \rangle^{(0)} \right] \hat{T}^+ + \\ U_d \hat{n}_{2\uparrow} \hat{n}_{2\downarrow} + U_a (\hat{n}_{1\uparrow} \hat{n}_{1\downarrow} + \hat{n}_{3\uparrow} \hat{n}_{3\downarrow}) \end{aligned} \quad (A3-2)$$

It is now clear that  $\hat{h}_T^{(0)}$  is different from  $\hat{h}_H$  and then their eigenvectors are not the same. However, exploiting the relation  $\hat{N}^+ + \hat{n}_2 = \hat{n}_1 + \hat{n}_2 + \hat{n}_3 = 2$  the equation (A3-2) can be recast in the form

$$\hat{h}_T^{(0)} = \hat{h}_H + \hat{h}_{EMV}^{(0)} + \hat{h}_{EIP}^{(0)} = \varepsilon' \hat{N}^+ - t' \hat{T}^+ + U_d \hat{n}_{2\uparrow} \hat{n}_{2\downarrow} + U_a (\hat{n}_{1\uparrow} \hat{n}_{1\downarrow} + \hat{n}_{3\uparrow} \hat{n}_{3\downarrow}) \quad (A3-3)$$

where

$$\varepsilon' = \varepsilon + \sum_i \frac{4g_{iD}^2}{\hbar\omega_{iD}} - \left( \frac{g_{iA}^2}{\hbar\omega_{iA}} + \frac{2g_{iD}^2}{\hbar\omega_{iD}} \right) \langle \hat{N}^+ \rangle \quad t' = t + \frac{g^2}{\hbar\omega_+} \langle \hat{T}^+ \rangle^{(0)} \quad (A3-4)$$

Thus, the eigenvectors (and the eigenvalues) of  $\hat{h}_T^{(0)}$  can be formally derived from that ones of  $\hat{h}_H$  by swapping the parameters  $\varepsilon$  and  $t$  with  $\varepsilon'$  and  $t'$ .

## APPENDIX 4

First of all, it is worth working out some relations in the time and frequency domain for a general function  $z(t)$  which depends on the electrical field  $\mathbf{E}(t)$ . The power series expansion of  $z(t)$  results

$$z(t) = z^{(1)}(t) + z^{(2)}(t) + z^{(3)}(t) \dots \quad (\text{A4-1})$$

where  $z^{(n)}(t)$  depends on  $\mathbf{E}^{(n)}(t)$ .

Choosing a monochromatic electrical field as

$$\mathbf{E}(t) = \frac{1}{2} [\mathbf{E}_{\omega_1} e^{-i\omega_1 t} + \mathbf{E}_{-\omega_1} e^{i\omega_1 t}] \quad (\text{A4-2})$$

where  $\mathbf{E}_{\omega_1} = \mathbf{E}_{-\omega_1}^* = \mathbf{E}_1$ , the following expressions are achieved at the first three orders

### TIME DOMAIN

$$z^{(1)}(t) = \frac{1}{\sqrt{2\pi}} [\tilde{z}^{(1)}(-\omega_1; +\omega_1) e^{-i\omega_1 t} + \tilde{z}^{(1)}(\omega_1; -\omega_1) e^{i\omega_1 t}] \quad (\text{A4-3})$$

$$z^{(2)}(t) = \frac{1}{\sqrt{2\pi}} [\tilde{z}^{(2)}(-2\omega_1; \omega_1, \omega_1) e^{-i2\omega_1 t} + \tilde{z}^{(2)}(0; \omega_1, -\omega_1) + \tilde{z}^{(2)}(+2\omega_1; -\omega_1, -\omega_1) e^{i2\omega_1 t}] \quad (\text{A4-4})$$

$$z^{(3)}(t) = \frac{1}{\sqrt{2\pi}} [\tilde{z}^{(3)}(-3\omega_1; \omega_1, \omega_1, \omega_1) e^{-3i\omega_1 t} + \tilde{z}^{(3)}(-\omega_1; \omega_1, \omega_1, -\omega_1) e^{-i\omega_1 t} + \tilde{z}^{(3)}(\omega_1; -\omega_1, -\omega_1, \omega_1) e^{i\omega_1 t} + \tilde{z}^{(3)}(+3\omega_1; -\omega_1, -\omega_1, -\omega_1) e^{3i\omega_1 t}] \quad (\text{A4-5})$$

### FREQUENCY DOMAIN

$$z^{(1)}(\omega) = \tilde{z}^{(1)}(-\omega_1; \omega_1) \delta(\omega - \omega_1) + \tilde{z}^{(1)}(\omega_1; -\omega_1) \delta(\omega + \omega_1) \quad (\text{A4-6})$$

$$z^{(2)}(\omega) = \tilde{z}^{(2)}(-2\omega_1; \omega_1, \omega_1) \delta(\omega - 2\omega_1) + \tilde{z}^{(2)}(0; \omega_1, -\omega_1) \delta(\omega) + \tilde{z}^{(2)}(+2\omega_1; -\omega_1, -\omega_1) \delta(\omega + 2\omega_1) \quad (\text{A4-7})$$

$$z^{(3)}(\omega) = \tilde{z}^{(3)}(-3\omega_1; \omega_1, \omega_1, \omega_1) \delta(\omega - 3\omega_1) + \tilde{z}^{(3)}(-\omega_1; \omega_1, \omega_1, -\omega_1) \delta(\omega - \omega_1) + \tilde{z}^{(3)}(\omega_1; -\omega_1, -\omega_1, \omega_1) \delta(\omega + \omega_1) + \tilde{z}^{(3)}(+3\omega_1; -\omega_1, -\omega_1, -\omega_1) \delta(\omega + 3\omega_1) \quad (\text{A4-8})$$

The Fourier transform and its inverse have been defined in Eq. (A2-14).

## The solution of the equation of motion for the density operator, Eq. (19)

Let's first recast  $\hat{h}_T(t)$  in Eq. 19 as the sum of two components:

$$\hat{h}_T(t) = \hat{h}(t) + \hat{f}(t) \quad (\text{A4-9})$$

where  $\hat{h}(t)$  collects all the terms that do not show any explicit dependence on the electrical field and  $\hat{f}(t)$  collects the others.

Eq. (19) is solved in a perturbative way by expanding the density matrix in a power series of  $\mathbf{E}$ :

$$\hat{\rho}(t) = \hat{\rho}^{(0)} + \hat{\rho}^{(1)}(t) + \hat{\rho}^{(2)}(t) + \dots \quad (\text{A4-10})$$

The Hamiltonian  $\hat{h}_T(t)$  contains  $\hat{\rho}(t)$  in the expectation values of the vibrational operators which are consequently expanded in power series:

$$\langle \hat{O} \rangle = \langle \hat{O} \rangle^{(0)} + \langle \hat{O} \rangle^{(1)} + \langle \hat{O} \rangle^{(2)} + \dots \quad (\text{A4-11})$$

where  $\langle \hat{O} \rangle^{(n)} = \text{Tr}[\hat{O}\hat{\rho}^{(n)}]$  and  $\hat{O}$  is any of the vibrational operators.

Working in the Liouville space instead of the Hilbert one, and substituting the expansions in the electrical field of Eq. (A4-9) into the equation of motion, Eq. (19), the following expressions for the first three orders are obtained:

$$i\hbar\hat{\rho}^{(1)}(t) = L\hat{\rho}^{(1)}(t) + [\hat{f}^{(1)}(t), \hat{\rho}^{(0)}] \quad (\text{A4-12})$$

$$i\hbar\hat{\rho}^{(2)}(t) = L\hat{\rho}^{(2)}(t) + [\hat{h}^{(1)}(t) + \hat{f}^{(1)}(t), \hat{\rho}^{(1)}(t)] + [\hat{f}^{(2)}(t), \hat{\rho}^{(0)}] \quad (\text{A4-13})$$

$$\begin{aligned} i\hbar\hat{\rho}^{(3)}(t) = & L\hat{\rho}^{(3)}(t) + [\hat{h}^{(1)}(t) + \hat{f}^{(1)}(t), \hat{\rho}^{(2)}] \\ & + [\hat{h}^{(2)}(t) + \hat{f}^{(2)}(t), \hat{\rho}^{(1)}] + [\hat{f}^{(3)}(t), \hat{\rho}^{(0)}] \end{aligned} \quad (\text{A4-14})$$

Solution of Eq. (A4-12) provides  $\hat{\rho}^{(1)}$  and consequently any first order term: inserting it into Eq. (A4-13), second order quantities can be worked out and so on. Further detail is given in Ref. 32: here we just remind that to solve previous Equations we need to perform a Fourier transform and therefore we get as a solution the density operator in the frequency domain.<sup>32</sup> We remind that the superscript in round brackets at the top of operators and expectation values correspond to the order in electrical field.

$L$  is the Liouville operator and it is defined, in the frequency domain, as

$$\sum_{nm} L_{ij,nm}(\omega) \rho_{nm}^{(n)}(\omega) = [\hat{h}^{(n)}(\omega), \hat{\rho}^{(0)}]_{ij} + [\hat{h}^{(0)}, \hat{\rho}^{(n)}(\omega)]_{ij} \quad (A4-15)$$

### The expression of $h_T$ at the first three orders.

Here we show the Fourier components for  $\hat{h}(t)$  and  $\hat{f}(t)$  up to the third order. The ones belonging to  $\hat{h}_T(t)$  can be calculated from Eq. (A4-9).  $\hat{h}_T$  in the frequency and time domain can be reconstructed from Eq. (A4-3)-(A4-5) and Eq. (A4-6)-(A4-8) respectively.

$$\hat{\tilde{h}}^{(1)}(\pm\omega_1; \mp\omega_1) = D_A(\mp\omega_1) \langle \hat{N}^-(\pm\omega_1; \mp\omega_1) \rangle^{(1)} \hat{N}^- - \frac{gR_m}{\sqrt{2}} F_-(\mp\omega_1) \langle \hat{T}^-(\pm\omega_1; \mp\omega_1) \rangle^{(1)} \hat{T}^- \quad (A4-16)$$

$$\begin{aligned} \hat{\tilde{h}}^{(2)}(\pm 2\omega_1; \mp\omega_1, \mp\omega_1) &= D_A(\mp 2\omega_1) \langle \hat{N}^+(\pm 2\omega_1; \mp\omega_1, \mp\omega_1) \rangle^{(2)} \hat{N}^+ \\ &\quad + D_D(\mp 2\omega_1) \langle \hat{n}_2(\pm 2\omega_1; \mp\omega_1, \mp\omega_1) \rangle^{(2)} \hat{n}_2 \\ &\quad - \frac{g}{\sqrt{2}} F_+(\mp 2\omega_1) \langle \hat{T}^+(\pm 2\omega_1; \mp\omega_1, \mp\omega_1) \rangle^{(2)} \hat{T}^+ \end{aligned} \quad (A4-17)$$

$$\begin{aligned} \hat{\tilde{h}}^{(2)}(0; \mp\omega_1, \pm\omega_1) &= D_A(0) \langle \hat{N}^+(0; \mp\omega_1, \pm\omega_1) \rangle^{(2)} \hat{N}^+ + D_D(0) \langle \hat{n}_2(0; \mp\omega_1, \pm\omega_1) \rangle^{(2)} \hat{n}_2 \\ &\quad - \frac{g}{\sqrt{2}} F_+(0) \langle \hat{T}^+(0; \mp\omega_1, \pm\omega_1) \rangle^{(2)} \hat{T}^+ \end{aligned} \quad (A4-18)$$

$$\begin{aligned} \hat{\tilde{h}}^{(3)}(\pm 3\omega_1; \mp\omega_1, \mp\omega_1, \mp\omega_1) &= D_A(\mp 3\omega_1) \langle \hat{N}^-(\pm 3\omega_1; \mp\omega_1, \mp\omega_1, \mp\omega_1) \rangle^{(3)} \hat{N}^- \\ &\quad - \frac{gR_m}{\sqrt{2}} F_-(\mp 3\omega_1) \langle \hat{T}^-(\pm 3\omega_1; \mp\omega_1, \mp\omega_1, \mp\omega_1) \rangle^{(3)} \hat{T}^- \end{aligned} \quad (A4-19)$$

$$\begin{aligned} \hat{\tilde{h}}^{(3)}(\pm\omega_1; \mp\omega_1, \mp\omega_1, \pm\omega_1) &= D_A(\mp\omega_1) \langle \hat{N}^-(\pm\omega_1; \mp\omega_1, \mp\omega_1, \pm\omega_1) \rangle^{(3)} \hat{N}^- \\ &\quad - \frac{gR_m}{\sqrt{2}} F_-(\mp\omega_1) \langle \hat{T}^-(\pm\omega_1; \mp\omega_1, \mp\omega_1, \pm\omega_1) \rangle^{(3)} \hat{T}^- \end{aligned}$$

(A4-20)

$$\begin{aligned}\hat{\hat{f}}^{(1)}(\pm\omega_1;\mp\omega_1) = & -\frac{\sqrt{\pi}gR_m}{2}G_{-}(\mp\omega_1)\langle\hat{N}^{+}\rangle^{(0)}E_{\mp\omega_1}\hat{T}^{-} \\ & -e\sqrt{\frac{\pi}{2}}\left[\frac{d_0}{2}+\frac{h_z}{2}F_{+}(0)\langle\hat{T}^{+}\rangle^{(0)}\right]E_{\mp\omega_1}\hat{N}^{-}\end{aligned}\quad (A4-21)$$

$$\begin{aligned}\hat{\hat{f}}^{(2)}(\pm 2\omega_1;\pm\omega_1,\pm\omega_1) = & -\frac{g}{2\sqrt{2}}G_{+}(\mp 2\omega_1)E_{\mp\omega_1}\langle\hat{N}^{-}(\pm\omega_1;\mp\omega_1)\rangle^{(1)}\hat{T}^{+} \\ & +\frac{eh_zR_m}{2\sqrt{2}}E_{\mp\omega_1}\langle\hat{u}_{-}(\pm\omega_1;\mp\omega_1)\rangle^{(1)}\hat{N}^{+}\end{aligned}\quad (A4-22)$$

$$\begin{aligned}\hat{\hat{f}}^{(2)}(0;\mp\omega_1,\pm\omega_1) = & -\frac{g}{2\sqrt{2}}G_{+}(0)E_{\mp\omega_1}\left[E_{\mp\omega_1}\langle\hat{N}^{-}(\mp\omega_1;\pm\omega_1)\rangle^{(1)}+E_{\pm\omega_1}\langle\hat{N}^{-}(\pm\omega_1;\mp\omega_1)\rangle^{(1)}\right]\hat{T}^{+} \\ & +\frac{eh_zR_m}{2\sqrt{2}}\left[E_{\mp\omega_1}\langle\hat{u}_{-}(\mp\omega_1;\pm\omega_1)\rangle^{(1)}+E_{\pm\omega_1}\langle\hat{u}_{-}(\pm\omega_1;\mp\omega_1)\rangle^{(1)}\right]\hat{N}^{+}\end{aligned}\quad (A4-23)$$

$$\begin{aligned}\hat{\hat{f}}^{(3)}(\pm 3\omega_1;\mp\omega_1,\mp\omega_1,\mp\omega_1) = & -\frac{gR_m}{2\sqrt{2}}G_{-}(\mp 3\omega_1)\left[\langle\hat{N}^{+}(\pm 2\omega_1;\mp\omega_1,\mp\omega_1)\rangle^{(2)}E_{\mp\omega_1}\right]\hat{T}^{-} \\ & -\frac{eh_z}{2\sqrt{2}}\left[\langle\hat{u}^{+}(\pm 2\omega_1;\mp\omega_1,\mp\omega_1)\rangle^{(2)}E_{\mp\omega_1}\right]\hat{N}^{-}\end{aligned}\quad (A4-24)$$

$$\begin{aligned}\hat{\hat{f}}^{(3)}(\pm\omega_1;\mp\omega_1,\mp\omega_1,\pm\omega_1) = & -\frac{gR_m}{2\sqrt{2}}G_{-}(\mp\omega_1)\left[\langle\hat{N}^{+}(0;\mp\omega_1,\pm\omega_1)\rangle^{(2)}E_{\mp\omega_1}+\langle\hat{N}^{+}(\pm 2\omega_1;\mp\omega_1,\mp\omega_1)\rangle^{(2)}E_{\pm\omega_1}\right]\hat{T}^{-} \\ & -\frac{eh_z}{2\sqrt{2}}\left[\langle\hat{u}_{+}(0;\mp\omega_1,\pm\omega_1)\rangle^{(2)}E_{\mp\omega_1}+\langle\hat{u}_{+}(\pm 2\omega_1;\mp\omega_1,\mp\omega_1)\rangle^{(2)}E_{\pm\omega_1}\right]\hat{N}^{-}\end{aligned}\quad (A4-25)$$

In the following, the expectation values for the BOV vibrational operators in the frequency domain are shown, in explicit form, from the first to the third order in the electrical field:

$$\langle\hat{u}_{-}(\omega)\rangle^{(0)} = 0 \qquad \langle\hat{u}_{+}(\omega)\rangle^{(0)} = F_{+}(0)\langle\hat{T}^{+}\rangle^{(0)} \quad (A4-26)$$

$$\langle \hat{u}_-(\pm \omega_1; \mp \omega_1) \rangle^{(1)} = F_-(\mp \omega_1) \langle \hat{T}^-(\pm \omega_1; \mp \omega_1) \rangle^{(1)} + \sqrt{\frac{\pi}{2}} G_-(\mp \omega_1) E_{\mp \omega_1} \langle \hat{N}^+ \rangle^{(0)} \quad (\text{A4-27})$$

$$\langle \hat{u}_+(\omega) \rangle^{(1)} = 0 \quad (\text{A4-28})$$

$$\langle \hat{u}_-(\omega) \rangle^{(2)} = 0 \quad (\text{A4-29})$$

$$\begin{aligned} \langle \hat{u}_+(\pm 2\omega_1; \mp \omega_1, \mp \omega_1) \rangle^{(2)} &= F_+(\mp 2\omega_1) \langle \hat{T}^+(\pm 2\omega_1; \mp \omega_1, \mp \omega_1) \rangle^{(2)} \\ &+ \frac{1}{2} G_+(\mp 2\omega_1) \langle \hat{N}^-(\pm \omega_1; \mp \omega_1) \rangle^{(1)} E_{\mp \omega_1} \end{aligned} \quad (\text{A4-30})$$

$$\begin{aligned} \langle \hat{u}_+(0; \mp \omega_1, \pm \omega_1) \rangle^{(2)} &= F_+(0) \langle \hat{T}^+(0; \mp \omega_1, \pm \omega_1) \rangle^{(2)} \\ &+ \frac{1}{2} G_+(0) \left[ \langle \hat{N}^-(\pm \omega_1; \mp \omega_1) \rangle^{(1)} E_{\pm \omega_1} + \langle \hat{N}^-(\mp \omega_1; \pm \omega_1) \rangle^{(1)} E_{\mp \omega_1} \right] \end{aligned} \quad (\text{A4-31})$$

$$\begin{aligned} \langle \hat{u}_-(\pm 3\omega_1; \mp \omega_1, \mp \omega_1, \mp \omega_1) \rangle^{(3)} &= F_-(\mp 3\omega_1) \langle \hat{T}^-(\pm 3\omega_1; \mp \omega_1, \mp \omega_1, \mp \omega_1) \rangle^{(3)} \\ &+ \frac{1}{2} G_-(\mp 3\omega_1) \langle \hat{N}^+(\pm 2\omega_1; \mp \omega_1, \mp \omega_1) \rangle^{(2)} E_{\mp \omega_1} \end{aligned} \quad (\text{A4-32})$$

$$\langle \hat{u}_+(\omega) \rangle^{(3)} = 0 \quad (\text{A4-33})$$

$$\begin{aligned} \langle \hat{u}_-(\pm \omega_1; \mp \omega_1, \mp \omega_1, \pm \omega_1) \rangle^{(3)} &= F_-(\mp \omega_1) \langle \hat{T}^-(\pm \omega_1; \mp \omega_1, \mp \omega_1, \pm \omega_1) \rangle^{(3)} \\ &+ \frac{1}{2} G_-(\mp \omega_1) \left[ \langle \hat{N}^+(\pm 2\omega_1; \mp \omega_1, \mp \omega_1) \rangle^{(2)} E_{\pm \omega_1} + \langle \hat{N}^+(0; \omega_1, -\omega_1) \rangle^{(2)} E_{\mp \omega_1} \right] \end{aligned} \quad (\text{A4-34})$$

## APPENDIX 5

Making use of the response theory, the following expressions are achieved for the polarizabilities and hyperpolarizabilities<sup>32</sup>:

$$\alpha(\pm\omega_1;\mp\omega_1) = \frac{2}{\varepsilon_0\sqrt{2\pi}E_1} \langle \hat{R}(\pm\omega_1;\mp\omega_1) \rangle^{(1)} \quad (\text{A5-1})$$

$$\gamma(\pm 3\omega_1;\mp\omega_1,\mp\omega_1,\mp\omega_1) = \frac{8}{\varepsilon_0\sqrt{2\pi}E_1^3} \langle \hat{R}(\pm 3\omega_1;\mp\omega_1,\mp\omega_1,\mp\omega_1) \rangle^{(3)} \quad (\text{A5-2})$$

$$\gamma(\pm\omega_1;\mp\omega_1,\mp\omega_1,\pm\omega_1) = \frac{8}{3\varepsilon_0\sqrt{2\pi}E_1^3} \langle \hat{R}(\pm\omega_1;\mp\omega_1,\mp\omega_1,\pm\omega_1) \rangle^{(3)}. \quad (\text{A5-3})$$

To write the expressions for the polarizabilities more than one convention is found in the literature. We followed the same convention as in the textbook by Butcher and Cotter.<sup>35</sup> The electrical field is defined in Eq. (A4-2).

The Fourier components of  $\hat{R}(t)$  at the first and third order are:

$$\langle \hat{R}^{(1)}(\pm\omega_1;\mp\omega_1) \rangle = e \left[ \frac{d_0}{2} + \frac{\hbar_z}{\sqrt{2}} \langle \hat{u}_+ \rangle^{(0)} \right] \langle \hat{N}^-(\pm\omega_1;\mp\omega_1) \rangle^{(1)} - \frac{e\hbar_z R_m}{\sqrt{2}} \langle \hat{u}_-(\pm\omega_1;\mp\omega_1) \rangle^{(1)} \langle \hat{N}^+ \rangle^{(0)} \quad (\text{A5-4})$$

$$\begin{aligned} \langle \hat{R}(\pm 3\omega_1;\mp\omega_1,\mp\omega_1,\mp\omega_1) \rangle^{(3)} &= e \left[ \frac{d_0}{2} + \frac{\hbar_z}{\sqrt{2}} \langle \hat{u}_+ \rangle^{(0)} \right] \langle \hat{N}^-(\pm 3\omega_1;\mp\omega_1,\mp\omega_1,\mp\omega_1) \rangle^{(3)} \\ &- e \frac{\hbar_z R_m}{\sqrt{2}} \langle \hat{N}^+ \rangle^{(0)} \langle \hat{u}_-(\pm 3\omega_1;\mp\omega_1,\mp\omega_1,\mp\omega_1) \rangle^{(3)} \\ &+ e \frac{\hbar_z}{\sqrt{2}} \langle \hat{u}_+(\pm 2\omega_1;\mp\omega_1,\mp\omega_1) \rangle^{(2)} \langle \hat{N}^-(\pm\omega_1;\mp\omega_1) \rangle^{(1)} \\ &- e \frac{\hbar_z R_m}{\sqrt{2}} \langle \hat{N}^+(\pm 2\omega_1;\mp\omega_1,\mp\omega_1) \rangle^{(2)} \langle \hat{u}_-(\pm\omega_1;\mp\omega_1) \rangle^{(1)} \end{aligned} \quad (\text{A5-5})$$

$$\begin{aligned}
\langle \hat{\mathbf{R}}(\pm \omega_1; \mp \omega_1, \mp \omega_1, \pm \omega_1) \rangle^{(3)} &= e \left[ \frac{\mathbf{d}_0}{2} + \frac{\mathbf{h}_z}{\sqrt{2}} \langle \hat{\mathbf{u}}_+ \rangle^{(0)} \right] \langle \hat{\mathbf{N}}^-(\pm \omega_1; \mp \omega_1, \mp \omega_1, \pm \omega_1) \rangle^{(3)} \\
&- e \frac{\mathbf{h}_z \mathbf{R}_m}{\sqrt{2}} \langle \hat{\mathbf{N}}^+ \rangle^{(0)} \langle \hat{\mathbf{u}}_-(\pm \omega_1; \mp \omega_1, \mp \omega_1, \pm \omega_1) \rangle^{(3)} \\
&+ e \frac{\mathbf{h}_z}{\sqrt{2}} \left[ \langle \hat{\mathbf{u}}_+(0; \mp \omega_1, \pm \omega_1) \rangle^{(2)} \langle \hat{\mathbf{N}}^-(\pm \omega_1; \mp \omega_1) \rangle^{(1)} + \langle \hat{\mathbf{u}}_+(\pm 2\omega_1; \mp \omega_1, \mp \omega_1) \rangle^{(0)} \langle \hat{\mathbf{N}}^-(\mp \omega_1; \pm \omega_1) \rangle^{(1)} \right] \\
&- e \frac{\mathbf{h}_z \mathbf{R}_m}{\sqrt{2}} \left[ \langle \hat{\mathbf{N}}^+(0; \mp \omega_1, \pm \omega_1) \rangle^{(2)} \langle \hat{\mathbf{u}}_-(\pm \omega_1; \mp \omega_1) \rangle^{(1)} \langle \hat{\mathbf{N}}^+(\pm 2\omega_1; \mp \omega_1, \mp \omega_1) \rangle^{(2)} \langle \hat{\mathbf{u}}_-(\mp \omega_1; \pm \omega_1) \rangle^{(1)} \right]
\end{aligned}$$

(A5-6)

## APPENDIX 6

TPA is often expressed in terms of absorption cross section,  $\sigma_2$ :

$$\sigma_2 = \frac{\hbar\omega_1}{N} a_2 \quad (\text{A6-1})$$

where  $N$  is the number of molecules per unit volume and

$$a_2 = \frac{3\omega_1 \text{Im}\chi^{(3)}(-\omega_1; \omega_1, \omega_1, -\omega_1)}{2\varepsilon_0 c^2 \eta_0^2} \quad (\text{SI units}) \quad (\text{A6-2})$$

$$a_2 = \frac{24\pi^2 \omega_1 \text{Im}\chi^{(3)}(-\omega_1; \omega_1, \omega_1, -\omega_1)}{c^2 \eta_0^2} \quad (\text{esu units}) \quad (\text{A6-3})$$

$\eta_0$  is the linear refractive index and  $c$  the speed of light.
